# Supplementary material
Source: publisher figshare collection journal article supplement (https://asha.figshare.com/articles/dataset/_/21265893)
Supplement: Supplementary file 1 [file 1]

**Supplemental Material S5.** Correlations between speech rates in single conditions and their significant predictors in the dual-task paradigm.

Dysarthria severity score and word rate:  $r = -.24, p = .209$ .

Shifting index from the Color Trails test and syllable rate:  $r = .20, p = .282$ .
