# Supplementary material
Source: publisher figshare collection journal article supplement (https://asha.figshare.com/articles/dataset/_/21265893)
Supplement: Supplementary file 2 [file 1]

**Supplemental Material S4.** Spearman rank correlations ( $p$ ) between accuracy DTC indices and predictors.

|                                   | Dysarthria<br>severity | Inhibition<br>index | Switching<br>index | Verbal<br>fluency |
|-----------------------------------|------------------------|---------------------|--------------------|-------------------|
| <b>Verbal accuracy DTC</b>        |                        |                     |                    |                   |
| Secondary task = processing speed | $p = .17$              | $p = .34$           | $p = .06$          | $p = -.12$        |
| Secondary task = inhibition       | $p = -.07$             | $p = .15$           | $p = -.11$         | $p = -.14$        |
| <b>Non-verbal accuracy DTC</b>    |                        |                     |                    |                   |
| Task = processing speed           | $p = -.12$             | $p = .06$           | $p = -.04$         | $p = .17$         |
| Task = inhibition                 | $p = .05$              | $p = .30$           | $p = -.03$         | $p = -.07$        |

All correlations values had  $p > .05$ .
