# Supplementary material
Source: publisher figshare collection journal article supplement (https://asha.figshare.com/articles/dataset/_/21265893)
Supplement: Supplementary file 3 [file 1]

**Supplemental Material S1.** Description of cognitive and speech performance for each participant.

| Participant | Mattis Dementia Rating Scale total | Inhibition index | Shifting z-score         | Phonemic Verbal fluency z-score | Dysarthria severity | Intelligibility (error frequency) | Maximum Phonation Time (secs.) | Speech rate DDK CV <sup>2</sup> (syll./sec.) | Speech rate DDK CCV <sup>3</sup> (syll./sec.) |
|-------------|------------------------------------|------------------|--------------------------|---------------------------------|---------------------|-----------------------------------|--------------------------------|----------------------------------------------|-----------------------------------------------|
| P1          | 144                                | 1.72             | 0.49                     | -0.24                           | 6                   | <b>2<sup>2</sup></b>              | 16.43                          | 8.22                                         | 10.06                                         |
| P2          | <b>126<sup>1</sup></b>             | 1.38             | 1.10                     | -0.52                           | 4                   | N/A                               | 36.11                          | 11.08                                        | 11.96                                         |
| P3          | 136                                | 1.56             | -0.25                    | <b>-1.53<sup>1</sup></b>        | 3                   | <b>6<sup>2</sup></b>              | 29.71                          | 8.67                                         | 10.60                                         |
| P4          | 139                                | 1.40             | <b>-1.35<sup>1</sup></b> | 0.07                            | 2                   | 0                                 | <b>6.07<sup>2</sup></b>        | 9.21                                         | 11.49                                         |
| P5          | 140                                | 1.40             | 0.04                     | -0.10                           | 3                   | 0                                 | 25.91                          | 11.01                                        | 14.79                                         |
| P6          | 134                                | 1.48             | 0.48                     | <b>-1.29<sup>1</sup></b>        | 4                   | <b>1<sup>1</sup></b>              | 19.16                          | 9.73                                         | 11.53                                         |
| P7          | 142                                | 1.23             | 0.33                     | 0.30                            | 4                   | 0                                 | 18.98                          | 8.15                                         | 11.08                                         |
| P8          | 142                                | 1.48             | 0.18                     | 1.94                            | 3                   | 0                                 | 25.22                          | 7.92                                         | 11.06                                         |
| P9          | 141                                | 1.12             | 0.70                     | 1.81                            | 8                   | <b>1<sup>1</sup></b>              | 26.18                          | 7.85                                         | 10.49                                         |
| P10         | 140                                | 1.01             | 1.45                     | 0.57                            | 3                   | 0                                 | 24.49                          | 11.64                                        | 13.53                                         |
| P11         | 140                                | 1.23             | 0.25                     | 1.90                            | 1                   | 0                                 | 25.51                          | 8.95                                         | 10.76                                         |
| P12         | 139                                | 1.62             | 1.45                     | -0.24                           | 9                   | 0                                 | 28.73                          | 11.99                                        | 14.37                                         |
| P13         | 142                                | 1.23             | 0.86                     | 1.70                            | 5                   | 0                                 | 26.52                          | 6.92                                         | 9.64                                          |
| P14         | 140                                | 1.47             | <b>-1.30<sup>1</sup></b> | -0.11                           | 6                   | <b>1<sup>1</sup></b>              | 14.91                          | 11.20                                        | 11.76                                         |
| P15         | 140                                | 1.44             | 1.03                     | <b>-1.34<sup>1</sup></b>        | 6                   | 0                                 | 13.49                          | 12.06                                        | 15.07                                         |
| P16         | 129                                | 0.88             | -0.29                    | <b>-1.88<sup>2</sup></b>        | 10                  | N/A                               | 14.34                          | 10.03                                        | 11.53                                         |
| P17         | 138                                | 1.30             | -0.33                    | 0.63                            | 6                   | 0                                 | 11.51                          | 7.97                                         | 10.93                                         |
| P18         | 135                                | 1.85             | -0.67                    | <b>-1.48<sup>1</sup></b>        | 13                  | <b>1<sup>1</sup></b>              | 12.95                          | 8.38                                         | 10.30                                         |
| P19         | 144                                | 1.48             | 1.10                     | 1.07                            | 2                   | <b>2<sup>2</sup></b>              | 22.15                          | 12.00                                        | <b>17.68<sup>2</sup></b><br>(faster)          |
| P20         | 139                                | 1.80             | -0.94                    | <b>-1.34<sup>1</sup></b>        | 11                  | 0                                 | 22.20                          | 10.81                                        | 12.00                                         |
| P21         | 134                                | 1.54             | 0.57                     | <b>-1.34<sup>1</sup></b>        | 5                   | 0                                 | <b>9.01<sup>1</sup></b>        | 8.81                                         | 11.69                                         |
| P22         | 138                                | 1.62             | 0.58                     | 1.40                            | 9                   | <b>2<sup>2</sup></b>              | 17.70                          | 11.79                                        | 13.76                                         |
| P23         | 142                                | 1.41             | -0.85                    | -0.79                           | 3                   | 0                                 | 30.36                          | 7.94                                         | 9.50                                          |
| P24         | 142                                | 1.06             | 0.76                     | -0.93                           | 3                   | 0                                 | 23.75                          | 12.13                                        | 16.46                                         |
| P25         | 144                                | 1.27             | 1.57                     | 1.33                            | 4                   | 0                                 | 13.84                          | 8.68                                         | 11.86                                         |
| P26         | 133                                | 1.55             | <b>-1.25<sup>1</sup></b> | -0.52                           | 7                   | 0                                 | <b>7.77<sup>1</sup></b>        | <b>12.96<sup>2</sup></b><br>(faster)         | <b>18.22<sup>2</sup></b><br>(faster)          |
| P27         | 142                                | 1.34             | 1.40                     | 2.45                            | 3                   | 0                                 | <b>7.76<sup>1</sup></b>        | 10.60                                        | 12.01                                         |
| P28         | 144                                | 1.46             | 0.89                     | -0.51                           | 1                   | 0                                 | 15.97                          | 9.98                                         | 11.94                                         |
| P29         | 142                                | 1.53             | 1.40                     | -0.16                           | 4                   | <b>1<sup>1</sup></b>              | 9.82                           | 9.30                                         | 10.06                                         |
| P30         | 143                                | 1.42             | -0.25                    | 0.27                            | 3                   | 0                                 | 18.05                          | 10.89                                        | 12.59                                         |

<sup>1</sup>Score at the limit of the norms (between -1.65 and < -1.28 standard deviation/Percentile 5 to < 10). <sup>2</sup>Impaired score (below -1.65 standard deviation/Percentile 5). <sup>3</sup>Diadochokinetic task: CV = consonant-vowel items; CCV = consonant-consonant-vowel items.

*Note.* Since the Inhibition index is based on an experimental task, no normative data are available for this task. For dysarthria severity (BECD scale), although no normative cut-off scores were published, the validation sample showed that 1% of patients showed a score of 0, 3% a score of 0 or 1, and 3.5% equal or below 2. In the control group, 42.5% showed a score of 0, 70% of 0 or 1, and 85% equal to or below 2. Intelligibility, maximum phonation time and speech rate were evaluated with the MonPaGe battery (Fougeron et al., 2016; Laganaro et al., 2021). Intelligibility test consists in producing 15 words appearing on a grid in a contextual sentence outside of the listener's visual field. The score is the error frequency (number of misperceived words). Maximum phonation time is produced with /a/ vowel at a comfortable level as long as possible for two trials (the best performance of the two is kept). Speech rate is evaluated based on a 7 items diadochokinetic task (speeded production of the same and alternating syllables during 4 seconds), including pauses. Score is the mean of the items for consonant-vowel items and consonant-consonant-vowel items. Two patients did not complete the intelligibility test.
