# Supplementary material
Source: publisher figshare collection journal article supplement (https://asha.figshare.com/articles/dataset/_/21265893)
Supplement: Supplementary file 4 [file 1]

## Supplemental Material S2. Model selection for the raw variable analysis.

### Word Rate: Model Selected = Model 5

| Model                                                                                                                                   | df | AIC   | BIC   | Likelihood ratio test              | $f^2$ |
|-----------------------------------------------------------------------------------------------------------------------------------------|----|-------|-------|------------------------------------|-------|
| <b>Model 1:</b><br>lmer(word rate ~ (Condition + Age + MattisTotal + DiseaseDuration + DiseaseSeverity + Education) + (1  Participant)) | 10 | 17.94 | 42.94 | $\chi^2(1) = 1.88$ ,<br>$p = .170$ | .05   |
| <b>Model 2:</b><br>lmer(word rate ~ (Condition + Age + MattisTotal + DiseaseDuration + DiseaseSeverity) + (1  Participant))             | 9  | 17.94 | 40.33 | $\chi^2(1) < 0.01$ ,<br>$p = .967$ | 0     |
| <b>Model 3:</b><br>lmer(word rate ~ (Condition + Age + MattisTotal + DiseaseDuration) + (1  Participant))                               | 8  | 15.83 | 35.83 | $\chi^2(1) = 0.08$ ,<br>$p = .784$ | 0     |
| <b>Model 4:</b><br>lmer(word rate ~ (Condition + Age + MattisTotal) + (1  Participant))                                                 | 7  | 13.91 | 31.40 | $\chi^2(1) = 1.08$ ,<br>$p = .299$ | .04   |
| <b>Model 5:</b><br>lmer(word rate ~ (Condition + Age) + (1  Participant))                                                               | 6  | 12.99 | 27.98 | $\chi^2(1) = 6.37$ ,<br>$p = .012$ | .21   |
| <b>Model 6:</b><br>lmer(word rate ~ (Condition) + (1  Participant))                                                                     | 5  | 17.36 | 29.86 | $\chi^2(2) = 4.79$ ,<br>$p = .091$ | .01   |
| <b>Model 7:</b><br>lmer(word rate ~ 1 + (1  Participant))                                                                               | 3  | 18.15 | 25.65 |                                    |       |

### Model 5 Parameters

| lmer(word rate ~ (Condition + Age) + (1  Participants), data=data[abs(scale(resid(model5)))<2.5,], REML=FALSE) |      |          |      |
|----------------------------------------------------------------------------------------------------------------|------|----------|------|
| Effect                                                                                                         | F    | df       | p    |
| Condition                                                                                                      | 3.60 | 2, 57.17 | .034 |
| Age                                                                                                            | 7.28 | 1, 29.98 | .011 |

Dual-processing speed:  $B = -0.002$ , Std Error  $B = 0.030$ ,  $t(57.19) = -0.06$ ,  $p = .953$

Dual-inhibition:  $B = -0.072$ , Std Error  $B = 0.031$ ,  $t(57.23) = -2.36$ ,  $p = .022$

### Syllable Rate: Model Selected = Model 5

| Model                                                                                                                                           | df | AIC     | BIC     | Likelihood ratio test              | $f^2$ |
|-------------------------------------------------------------------------------------------------------------------------------------------------|----|---------|---------|------------------------------------|-------|
| <b>Model 1:</b><br>lmer(syllable rate log ~ (Condition + Age + MattisTotal + DiseaseDuration + DiseaseSeverity + Education) + (1  Participant)) | 10 | -273.06 | -248.06 | $\chi^2(1) = 3.05$ ,<br>$p = .081$ | .09   |
| <b>Model 2:</b><br>lmer(syllable rate log ~ (Condition + Age + MattisTotal + DiseaseDuration + DiseaseSeverity) + (1  Participant))             | 9  | -272.00 | -249.51 | $\chi^2(1) < 0.01$ ,<br>$p = .958$ | 0     |
| <b>Model 3:</b><br>lmer(syllable rate log ~ (Condition + Age + MattisTotal + DiseaseDuration) + (1  Participant))                               | 8  | -274.00 | -254.00 | $\chi^2(1) = 0.69$ ,<br>$p = .407$ | .02   |
| <b>Model 4:</b><br>lmer(syllable rate log ~ (Condition + Age + MattisTotal) + (1  Participant))                                                 | 7  | -275.31 | -257.82 | $\chi^2(1) = 0.02$ ,<br>$p = .899$ | 0     |
| <b>Model 5:</b><br>lmer(syllable rate log ~ (Condition + Age) + (1  Participant))                                                               | 6  | -277.30 | -262.30 | $\chi^2(1) = 3.84$ ,<br>$p = .049$ | .14   |
| <b>Model 6:</b><br>lmer(syllable rate log ~ (Condition) + (1  Participant))                                                                     | 5  | -275.46 | -262.96 | $\chi^2(2) = 3.82$ ,<br>$p = .148$ | < .01 |
| <b>Model 7:</b><br>lmer(syllable rate log ~ 1 + (1  Participant))                                                                               | 3  | -275.64 | -268.14 |                                    |       |

### Model 5 Parameters

| lmer(syllable ratelog ~ (Condition + Age) + (1 Participants), data=data[abs(scale(resid(model5)))<2.5,], REML=FALSE) |      |          |      |
|----------------------------------------------------------------------------------------------------------------------|------|----------|------|
| Effect                                                                                                               | F    | df       | p    |
| Condition                                                                                                            | 2.89 | 2, 55.48 | .064 |
| Age                                                                                                                  | 5.21 | 1, 29.34 | .030 |

Dual-processing speed: B = 0.011, Std Error B = 0.006,  $t(55.47) = 2.03$ ,  $p = .048$

Dual-inhibition: B = -0.001, Std Error B = 0.062,  $t(55.42) = -0.14$ ,  $p = .888$

### RTs: Model Selected = Model 3

| Model                                                                                                                                                       | df | AIC            | BIC            | Likelihood ratio test                                    | $f^2$      |
|-------------------------------------------------------------------------------------------------------------------------------------------------------------|----|----------------|----------------|----------------------------------------------------------|------------|
| <b>Model 1:</b><br>lmer(RTlog ~ (Task + Condition + Condition:Task + Age + MattisTotal + DiseaseDuration + DiseaseSeverity + Education) + (1  Participant)) | 11 | -330.86        | -300.20        | $\chi^2(1) = 0.79$ ,<br>$p = .375$                       | .03        |
| <b>Model 2:</b><br>lmer(RTlog ~ (Task + Condition + Condition:Task + Age + MattisTotal + DiseaseDuration + DiseaseSeverity) + (1  Participant))             | 10 | -332.08        | -304.20        | $\chi^2(1) = 0.02$ ,<br>$p = .891$                       | 0          |
| <b>Model 3:</b><br>lmer(RTlog ~ (Task + Condition + Condition:Task + Age + MattisTotal + DiseaseDuration) + (1  Participant))                               | 9  | <b>-334.06</b> | <b>-308.97</b> | $\chi^2(1) = 10.94$ ,<br><b><math>p &lt; .001</math></b> | <b>.24</b> |
| <b>Model 4:</b><br>lmer(RTlog ~ (Task + Condition + Condition:Task + Age + MattisTotal) + (1  Participant))                                                 | 8  | -325.12        | -302.82        | $\chi^2(1) = 0.13$ ,<br>$p = .714$                       | .02        |
| <b>Model 5:</b><br>lmer(RTlog ~ (Task + Condition + Condition:Task + Age + (1  Participant))                                                                | 7  | -326.99        | -307.47        | $\chi^2(1) = 1.44$ ,<br>$p = .230$                       | .02        |
| <b>Model 6:</b><br>lmer(RTlog ~ (Task + Condition + Condition:Task) + (1  Participant))                                                                     | 6  | <b>-327.55</b> | <b>-310.82</b> | $\chi^2(1) = 13.20$ ,<br><b><math>p &lt; .001</math></b> | <b>.05</b> |
| <b>Model 7:</b><br>lmer(RTlog ~ (Task + Condition) + (1  Participant))                                                                                      | 5  | <b>-316.35</b> | <b>-302.41</b> | $\chi^2(1) = 43.18$ ,<br><b><math>p &lt; .001</math></b> | <b>.21</b> |
| <b>Model 8:</b><br>lmer(RTlog ~ (Task) + (1  Participant))                                                                                                  | 4  | <b>-275.17</b> | <b>-264.02</b> | $\chi^2(1) = 63.80$ ,<br><b><math>p &lt; .001</math></b> | <b>.47</b> |
| <b>Model 9:</b><br>lmer(RTlog ~ (1) + (1  Participant))                                                                                                     | 3  | -213.37        | -205.01        |                                                          |            |

### Model 3 Parameters

| lmer(RTlog ~ (Task + Condition + Condition:Task + Age + MattisTotal + DiseaseDuration), data=data[abs(scale(resid(model3)))<2.5,], REML=FALSE) |               |                 |                  |
|------------------------------------------------------------------------------------------------------------------------------------------------|---------------|-----------------|------------------|
| Effect                                                                                                                                         | F             | Df              | p                |
| Task                                                                                                                                           | <b>234.89</b> | <b>1, 87.70</b> | <b>&lt; .001</b> |
| Condition                                                                                                                                      | <b>67.07</b>  | <b>1, 87.70</b> | <b>&lt; .001</b> |
| Condition by Task                                                                                                                              | <b>18.48</b>  | <b>1, 87.72</b> | <b>&lt; .001</b> |
| Age                                                                                                                                            | 0.94          | 1, 29.37        | .804             |
| Mattis total                                                                                                                                   | 0.06          | 1, 29.61        | .341             |
| Disease duration                                                                                                                               | <b>15.45</b>  | <b>1, 29.86</b> | <b>&lt; .001</b> |

Post-hoc comparison for condition by task interaction (Tukey correction):

**Condition effect for processing speed: B = -0.095, Std Error B = 0.011,  $t(91.20) = -8.68$ ,  $p < .001$**

**Condition effect for inhibition: B = -0.030, Std Error B = 0.011,  $t(91.20) = -2.71$ ,  $p = .008$**
