# Supplementary material
Source: publisher figshare collection journal article supplement (https://asha.figshare.com/articles/dataset/_/21265893)
Supplement: Supplementary file 5 [file 1]

### Supplemental Material S3. Model selection for word rate, syllable rate, and RTs DTC.

#### Word Rate DTC: Model Selected = Model 9

| Parameters                                                                                                                                                                                                                            | <i>df</i> | AIC            | BIC            | Likelihood ratio test                                                  | <i>f</i> <sup>2</sup> |
|---------------------------------------------------------------------------------------------------------------------------------------------------------------------------------------------------------------------------------------|-----------|----------------|----------------|------------------------------------------------------------------------|-----------------------|
| <b>Model 1:</b><br>Imer(Word rate DTC ~ (Task + DysarthriaSeverity + ShiftingIndex + InhibitionIndex + Phonemic Verbal Fluency + DysarthriaSeverity:Task + Age + Mattis-DRS + Disease severity + Disease duration) + (1 Participant)) | 15        | -272.71        | -241.29        | $\chi^2(1) = 0.12$ ,<br>$p = .732$                                     | 0                     |
| <b>Model 2:</b><br>Imer(Word rate DTC ~ (Task + DysarthriaSeverity + ShiftingIndex + InhibitionIndex + Phonemic Verbal Fluency + DysarthriaSeverity:Task + Age + Mattis-DRS + Disease severity) + (1 Participant))                    | 14        | -274.59        | -245.27        | $\chi^2(3) = 1.95$ ,<br>$p = .583$                                     | .04                   |
| <b>Model 3:</b><br>Imer(Word rate DTC ~ (Task + DysarthriaSeverity + ShiftingIndex + InhibitionIndex + Phonemic Verbal Fluency + DysarthriaSeverity:Task + Age + Mattis-DRS) + (1 Participant))                                       | 11        | -278.64        | -255.60        | $\chi^2(1) = 0.64$ ,<br>$p = .425$                                     | .01                   |
| <b>Model 4:</b><br>Imer(Word rate DTC ~ (Task + DysarthriaSeverity + ShiftingIndex + InhibitionIndex + Phonemic Verbal Fluency + DysarthriaSeverity:Task + Age) + (1 Participant))                                                    | 10        | -280.00        | -259.06        | $\chi^2(1) = 0.71$ ,<br>$p = .398$                                     | .01                   |
| <b>Model 5:</b><br>Imer(Word rate DTC ~ (Task + DysarthriaSeverity + ShiftingIndex + InhibitionIndex + Phonemic Verbal Fluency + DysarthriaSeverity D:Task) + (1 Participant))                                                        | 9         | -281.29        | -262.44        | $\chi^2(1) = 0.18$ ,<br>$p = .671$                                     | 0                     |
| <b>Model 6:</b><br>Imer(Word rate DTC ~ (Task + DysarthriaSeverity + ShiftingIndex + InhibitionIndex + Phonemic Verbal Fluency) + (1 Participant))                                                                                    | 8         | -283.11        | -266.35        | $\chi^2(1) = 3.63$ ,<br>$p = .057$                                     | .08                   |
| <b>Model 7:</b><br>Imer(Word rate DTC ~ (Task + DysarthriaSeverity + ShiftingIndex + InhibitionIndex) + (1 Participant))                                                                                                              | 7         | -281.48        | -266.82        | $\chi^2(1) = 0.05$ ,<br>$p = .815$                                     | 0                     |
| <b>Model 8:</b><br>Imer(Word rate DTC ~ (Task + DysarthriaSeverity + ShiftingIndex) + (1 Participant))                                                                                                                                | 6         | -283.43        | -270.86        | $\chi^2(1) = 0.07$ ,<br>$p = .790$                                     | 0                     |
| <b>Model 9:</b><br>Imer(Word rate DTC ~ (Task + DysarthriaSeverity) + (1 Participant))                                                                                                                                                | 5         | <b>-285.36</b> | <b>-274.88</b> | <b><math>\chi^2(1) = 6.14</math></b> ,<br><b><math>p = .013</math></b> | <b>.14</b>            |
| <b>Model 10:</b><br>Imer(Word rate DTC ~ (Task) + (1 Participant))                                                                                                                                                                    | 4         | -281.22        | -272.84        | $\chi^2(1) = 2.47$ ,<br>$p = .116$                                     | .03                   |
| <b>Model 11:</b><br>Imer(Word rate DTC ~ 1 + (1 Participant))                                                                                                                                                                         | 3         | -280.75        | -274.46        |                                                                        |                       |

#### Model 9 Parameters

| Imer(word rate DTC ~ (Task + Dysarthria severity) + (1 Participants), data=data[abs(scale(resid(model9)))<2.5,], REML=FALSE) |             |                 |             |
|------------------------------------------------------------------------------------------------------------------------------|-------------|-----------------|-------------|
| Effect                                                                                                                       | <i>F</i>    | <i>df</i>       | <i>p</i>    |
| Task                                                                                                                         | 2.93        | 1, 26.15        | .099        |
| <b>Dysarthria severity</b>                                                                                                   | <b>9.94</b> | <b>1, 25.78</b> | <b>.004</b> |

### Syllable Rate DTC: Model Selected = Model 8

| Parameters                                                                                                                                                                                                                                | df | AIC     | BIC     | Likelihood ratio test              | $f^2$ |
|-------------------------------------------------------------------------------------------------------------------------------------------------------------------------------------------------------------------------------------------|----|---------|---------|------------------------------------|-------|
| <b>Model 1:</b><br>lmer(Syllable rate DTC ~ (Task + DysarthriaSeverity + ShiftingIndex + InhibitionIndex + Phonemic Verbal Fluency + DysarthriaSeverity:Task + Age + Mattis-DRS + Disease severity + Disease duration) + (1 Participant)) | 15 | -303.18 | -271.77 | $\chi^2(1) = 0.33$ ,<br>$p = .568$ | 0     |
| <b>Model 2:</b><br>lmer(Syllable rate DTC ~ (Task + DysarthriaSeverity + ShiftingIndex + InhibitionIndex + Phonemic Verbal Fluency + DysarthriaSeverity:Task + Age + Mattis-DRS + Disease severity) + (1 Participant))                    | 14 | -304.86 | -275.54 | $\chi^2(3) = 2.02$ ,<br>$p = .569$ | .05   |
| <b>Model 3:</b><br>lmer(Syllable rate DTC ~ (Task + DysarthriaSeverity + ShiftingIndex + InhibitionIndex + Phonemic Verbal Fluency + DysarthriaSeverity:Task + Age + Mattis-DRS) + (1 Participant))                                       | 11 | -308.84 | -285.80 | $\chi^2(1) = 0.18$ ,<br>$p = .672$ | 0     |
| <b>Model 4:</b><br>lmer(Syllable rate DTC ~ (Task + DysarthriaSeverity + ShiftingIndex + InhibitionIndex + Phonemic Verbal Fluency + DysarthriaSeverity:Task + Age) + (1 Participant))                                                    | 10 | -310.66 | -289.71 | $\chi^2(1) = 0.41$ ,<br>$p = .521$ | .01   |
| <b>Model 5:</b><br>lmer(Syllable rate DTC ~ (Task + DysarthriaSeverity + ShiftingIndex + InhibitionIndex + Phonemic Verbal Fluency + DysarthriaSeverity:Task) + (1 Participant))                                                          | 9  | -312.25 | -293.40 | $\chi^2(1) = 0.73$ ,<br>$p = .392$ | .01   |
| <b>Model 6:</b><br>lmer(Syllable rate DTC ~ (Task + DysarthriaSeverity + ShiftingIndex + InhibitionIndex + Phonemic Verbal Fluency) + (1 Participant))                                                                                    | 8  | -313.51 | -296.76 | $\chi^2(1) = 0.82$ ,<br>$p = .365$ | .02   |
| <b>Model 7:</b><br>lmer(Syllable rate DTC ~ (Task + DysarthriaSeverity + ShiftingIndex + InhibitionIndex) + (1 Participant))                                                                                                              | 7  | -314.69 | 300.04  | $\chi^2(1) = 0.51$ ,<br>$p = .475$ | 0     |
| <b>Model 8:</b><br>lmer(Syllable rate DTC ~ (Task + DysarthriaSeverity + ShiftingIndex) + (1 Participant))                                                                                                                                | 6  | -316.18 | -303.62 | $\chi^2(1) = 4.02$ ,<br>$p = .045$ | .11   |
| <b>Model 9:</b><br>lmer(Syllable rate DTC ~ (Task + DysarthriaSeverity) + (1 Participant))                                                                                                                                                | 5  | -314.16 | -303.69 | $\chi^2(1) = 1.32$ ,<br>$p = .250$ | .03   |
| <b>Model 10:</b><br>lmer(Syllable rate DTC ~ (Task) + (1 Participant))                                                                                                                                                                    | 4  | -314.84 | -306.46 | $\chi^2(1) = 3.13$ ,<br>$p = .077$ | .03   |
| <b>Model 11:</b><br>lmer(Syllable rate DTC ~ 1 + (1 Participant))                                                                                                                                                                         | 3  | -313.71 | -307.42 |                                    |       |

### Model 8 Parameters

| lmer(syllable rate DTC ~ (Task + Dysarthria severity) + (1 Participants), data=data[abs(scale(resid(model8)))<2.5,], REML=FALSE) |      |          |      |
|----------------------------------------------------------------------------------------------------------------------------------|------|----------|------|
| Effect                                                                                                                           | F    | df       | p    |
| Task                                                                                                                             | 7.49 | 1, 29.71 | .010 |
| Dysarthria severity                                                                                                              | 2.30 | 1, 30.69 | .139 |
| Shifting                                                                                                                         | 5.65 | 1, 30.04 | .024 |

# RTs DTC : Model Selected = Model 10

| Parameters                                                                                                                                                                                                                      | df | AIC     | BIC     | Likelihood ratio test               | f <sup>2</sup> |
|---------------------------------------------------------------------------------------------------------------------------------------------------------------------------------------------------------------------------------|----|---------|---------|-------------------------------------|----------------|
| <b>Model 1:</b><br>lmer(RTs DTC ~ (Task + DysarthriaSeverity + ShiftingIndex + InhibitionIndex + Phonemic Verbal Fluency + DysarthriaSeverity:Task + Age + Mattis-DRS + Disease severity + Disease duration) + (1 Participant)) | 15 | -230.35 | -198.94 | $\chi^2(1) = 0.40$ ,<br>$p = .528$  | 0              |
| <b>Model 2:</b><br>lmer(RTs DTC ~ (Task + DysarthriaSeverity + ShiftingIndex + InhibitionIndex + Phonemic Verbal Fluency + DysarthriaSeverity:Task + Age + Mattis-DRS + Disease severity) + (1 Participant))                    | 14 | -231.95 | -202.63 | $\chi^2(3) = 4.81$ ,<br>$p = .186$  | .11            |
| <b>Model 3:</b><br>lmer(RTs DTC ~ (Task + DysarthriaSeverity + ShiftingIndex + InhibitionIndex + Phonemic Verbal Fluency + DysarthriaSeverity:Task + Age + Mattis-DRS) + (1 Participant))                                       | 11 | -233.14 | -210.10 | $\chi^2(1) = 0.02$ ,<br>$p = .900$  | .01            |
| <b>Model 4:</b><br>lmer(RTs DTC ~ (Task + DysarthriaSeverity + ShiftingIndex + InhibitionIndex + Phonemic Verbal Fluency + DysarthriaSeverity:Task + Age) + (1 Participant))                                                    | 10 | -235.13 | -214.18 | $\chi^2(1) = 0.61$ ,<br>$p = .434$  | .01            |
| <b>Model 5:</b><br>lmer(RTs DTC ~ (Task + DysarthriaSeverity + ShiftingIndex + InhibitionIndex + Phonemic Verbal Fluency + DysarthriaSeverity:Task) + (1 Participant))                                                          | 9  | -236.51 | -217.66 | $\chi^2(1) = 0.19$ ,<br>$p = .662$  | 0              |
| <b>Model 6:</b><br>lmer(RTs DTC ~ (Task + DysarthriaSeverity + ShiftingIndex + InhibitionIndex + Phonemic Verbal Fluency) + (1 Participant))                                                                                    | 8  | -238.32 | -221.57 | $\chi^2(1) = 2.35$ ,<br>$p = .125$  | .05            |
| <b>Model 7:</b><br>lmer(RTs DTC ~ (Task + DysarthriaSeverity + ShiftingIndex + InhibitionIndex) + (1 Participant))                                                                                                              | 7  | -237.97 | -223.31 | $\chi^2(1) = 0.48$ ,<br>$p = .487$  | .01            |
| <b>Model 8:</b><br>lmer(RTs DTC ~ (Task + DysarthriaSeverity + ShiftingIndex) + (1 Participant))                                                                                                                                | 6  | -239.49 | -226.93 | $\chi^2(1) = 0.39$ ,<br>$p = .534$  | 0              |
| <b>Model 9:</b><br>lmer(RTs DTC ~ (Task + DysarthriaSeverity) + (1 Participant))                                                                                                                                                | 5  | -241.10 | -230.63 | $\chi^2(1) = 0.57$ ,<br>$p = .449$  | .01            |
| <b>Model 10:</b><br>lmer(RTs DTC ~ (Task) + (1 Participant))                                                                                                                                                                    | 4  | -242.53 | -234.16 | $\chi^2(1) = 18.88$ ,<br>$p < .001$ | .27            |
| <b>Model 11:</b><br>lmer(RTs DTC ~ 1 + (1 Participant))                                                                                                                                                                         | 3  | -225.65 | -219.37 |                                     |                |

## Model 10 Parameters

| lmer(RTs DTC ~ (Task) + (1 Participants), data=data[abs(scale(resid(model10)))<2.5,], REML=FALSE) |       |          |        |
|---------------------------------------------------------------------------------------------------|-------|----------|--------|
| Effect                                                                                            | F     | df       | p      |
| Task                                                                                              | 35.72 | 1, 29.72 | < .001 |
